# Supplementary material
Source: PubMed Central journal article supplement (PMC11060066)
Supplement: NIHMS1986777-supplement-AD_Metabolomics-SI.pdf [file NIHMS1986777-supplement-AD_Metabolomics-SI.pdf]

## Supporting Information

---

### **Metabolic profiling of neocortical tissue discriminates Alzheimer's disease from mild cognitive impairment, high pathology controls, and normal controls**

Paniz Jasbi<sup>1+</sup>, Xiaojian Shi<sup>1,2+</sup>, Ping Chu<sup>3</sup>, Natalie Elliott<sup>3</sup>, Haley Hudson<sup>3</sup>, Douglas Jones<sup>4</sup>, Geidy Serrano<sup>5</sup>, Brandon Chow<sup>1</sup>, Thomas G. Beach<sup>5</sup>, Li Liu<sup>6,7</sup>, Garilyn Jentarra<sup>3,8\*</sup>, Haiwei Gu<sup>1\*</sup>

<sup>1</sup>Arizona Metabolomics Laboratory, College of Health Solutions, Arizona State University, Phoenix, AZ 85004, USA

<sup>2</sup>Systems Biology Institute, Cellular and Molecular Physiology, Yale School of Medicine, West Haven, CT 06516, USA

<sup>3</sup>Department of Biochemistry and Molecular Genetics, <sup>4</sup>Department of Pharmacology, Midwestern University, Glendale, AZ 85308, USA

<sup>5</sup>Banner Sun Health Research Institute, Sun City, AZ 85351, USA

<sup>6</sup>College of Health Solutions, Biodesign Institute, Arizona State University, Tempe, Arizona 85281, USA

<sup>7</sup>Department of Neurology, Mayo Clinic, Scottsdale, Arizona 85259, USA

<sup>8</sup>Precision Medicine Program, Midwestern University, Glendale, AZ 85308, USA

<sup>+</sup>Authors contributed equally

<sup>\*</sup>Corresponding authors

---

**Page S-4: Table S1.** Matrix of correlation analysis between candidate markers and clinical characteristics showing  $r$  and ( $p$ ).

**Page S-6: Table S2.** Full list of significantly enriched enzymes in response to Alzheimer's progression. For analysis, subjects were dichotomously grouped as case (MCI and AD) and control (NC and HPC).

**Page S-7: Figure S1.** Scores plot of principal component analysis (PCA) conducted with all reliably detected metabolites between all groups, including quality control (QC) samples; 95% confidence intervals were evaluated for potential outliers. Data for sample 13 (HPC group) was reviewed and removed from further analysis.

**Page S-8: Figure S2.** Significant metabolites between case (AD and MCI) and control (HPC and NC) as determined by independent samples t-test. Data were  $\log_{10}$ -transformed and Pareto scaled prior to plotting.

**Page S-9: Figure S3.** ROC analysis of PLS-DA model constructed using levels of lauric acid, myristic acid, stearic acid, and palmitic acid (all  $p < 0.05$ ): (A) classification of NC vs. HPC/MCI/AD, (B) classification of HPC vs. NC/MCI/AD, (C) classification of MCI vs. NC/HPC/AD, and (D) classification of AD vs. NC/HPC/MCI.

**Page S-10: Figure S4.** (A) RF analysis of study groups based on levels of lauric acid, myristic acid, stearic acid, palmitic acid (OOB error = 0.511), and (B) 100-fold LOOCV ROC analysis of case (MCI/AD) and control (NC/HPC) using RF classifier (AUC = 0.917).

**Page S-11: Figure S5.** Univariate ROC analysis and t-testing between NC and MCI groups show lauric acid to be highly predictive (AUC = 0.993) and significant (FDR  $q < 0.001$ ).

**Page S-12: Figure S6.** Univariate ROC analysis and t-testing between NC and AD groups show lauric acid to be highly predictive (AUC = 1.0) and significant (FDR  $q < 0.001$ ).

**Page S-13: Figure S7.** Univariate ROC analysis and t-testing of between HPC and AD groups show high predictive performance (AUC > 0.90) and significance (FDR  $q < 0.01$ ) of myristic acid, lauric acid, palmitic acid, and stearic acid.

**Page S-14: Figure S8.** (A) Scores plot of PLS-DA model constructed using significant between-group metabolites (lauric acid, myristic acid, stearic acid, palmitic acid) in conjunction with highly correlated neuropathological characteristics (frontal plaque, total plaque, total tangle, and Braak score) ( $R^2X = 0.710$ ,  $R^2Y = 0.748$ ,  $R^2Q = 0.722$ ) and (B) Permutation testing with 100 iterations shows excellent model fit ( $p < 0.01$ ).

**Page S-15: Figure S9.** Network view of enzyme enrichment analysis conducted between case (MCI and AD) and control (NC and HPC). Enrichment ratios were significantly different for eleven enzymes between groups ( $p < 0.05$ ).

---

**Table S1.** Matrix of correlation analysis between candidate markers and clinical characteristics showing *r* and (*p*).

| Clinical Characteristic | 272.2@20.932005   | 147.1@14.3080015  | 147.1@20.774895   | 73.1@27.868113    | Lauric acid       | Myristic acid     | Palmitoleic acid  | Palmitic acid     | Stearic acid      |
|-------------------------|-------------------|-------------------|-------------------|-------------------|-------------------|-------------------|-------------------|-------------------|-------------------|
| Age                     | -0.079<br>(0.598) | 0.048<br>(0.748)  | -0.036<br>(0.810) | -0.103<br>(0.490) | -0.043<br>(0.775) | 0.150<br>(0.313)  | 0.210<br>(0.157)  | 0.168<br>(0.259)  | 0.168<br>(0.259)  |
| Sex                     | 0.116<br>(0.437)  | -0.246<br>(0.095) | -0.012<br>(0.936) | -0.100<br>(0.505) | -0.071<br>(0.638) | 0.104<br>(0.488)  | 0.234<br>(0.114)  | 0.181<br>(0.222)  | 0.136<br>(0.360)  |
| PMI                     | 0.219<br>(0.139)  | 0.019<br>(0.897)  | 0.183<br>(0.217)  | -0.078<br>(0.604) | -0.269<br>(0.067) | -0.221<br>(0.135) | -0.222<br>(0.134) | -0.149<br>(0.318) | -0.154<br>(0.302) |
| APOE alleles            | -0.045<br>(0.762) | 0.048<br>(0.751)  | -0.047<br>(0.755) | -0.084<br>(0.574) | 0.092<br>(0.538)  | 0.051<br>(0.733)  | 0.058<br>(0.699)  | 0.031<br>(0.839)  | 0.043<br>(0.777)  |
| MMSE                    | -0.097<br>(0.515) | 0.114<br>(0.445)  | -0.064<br>(0.669) | 0.362<br>(0.012)  | 0.363<br>(0.012)  | 0.398<br>(0.006)  | 0.202<br>(0.172)  | 0.278<br>(0.059)  | 0.294<br>(0.045)  |
| Frontal plaque          | 0.198<br>(0.182)  | -0.036<br>(0.810) | 0.130<br>(0.382)  | -0.160<br>(0.283) | -0.598<br>(0.000) | -0.085<br>(0.569) | 0.118<br>(0.428)  | 0.003<br>(0.982)  | -0.004<br>(0.981) |
| Total Plaque            | 0.296<br>(0.043)  | -0.092<br>(0.539) | 0.157<br>(0.293)  | -0.153<br>(0.305) | -0.579<br>(0.000) | -0.100<br>(0.503) | 0.108<br>(0.469)  | -0.001<br>(0.993) | -0.002<br>(0.988) |
| Frontal Tangle          | 0.203<br>(0.172)  | -0.129<br>(0.387) | 0.070<br>(0.639)  | -0.141<br>(0.345) | -0.410<br>(0.004) | -0.399<br>(0.005) | -0.109<br>(0.467) | -0.289<br>(0.048) | -0.276<br>(0.061) |
| Total Tangle            | 0.111<br>(0.457)  | -0.200<br>(0.177) | 0.148<br>(0.322)  | -0.246<br>(0.096) | -0.507<br>(0.000) | -0.350<br>(0.016) | -0.011<br>(0.941) | -0.219<br>(0.138) | -0.229<br>(0.122) |

|             |                  |                   |                  |                   |                   |                   |                   |                   |                   |
|-------------|------------------|-------------------|------------------|-------------------|-------------------|-------------------|-------------------|-------------------|-------------------|
| Braak score | 0.063<br>(0.672) | -0.157<br>(0.293) | 0.198<br>(0.182) | -0.252<br>(0.087) | -0.539<br>(0.000) | -0.353<br>(0.015) | -0.046<br>(0.757) | -0.234<br>(0.113) | -0.250<br>(0.091) |
| Frontal CAA | 0.105<br>(0.481) | 0.036<br>(0.811)  | 0.179<br>(0.228) | -0.165<br>(0.267) | -0.169<br>(0.257) | 0.094<br>(0.529)  | 0.274<br>(0.063)  | 0.209<br>(0.159)  | 0.196<br>(0.187)  |
| Total CAA   | 0.100<br>(0.502) | 0.005<br>(0.972)  | 0.083<br>(0.579) | -0.164<br>(0.269) | -0.211<br>(0.155) | 0.091<br>(0.543)  | 0.295<br>(0.044)  | 0.219<br>(0.139)  | 0.194<br>(0.191)  |

---

**Table S2.** Full list of significantly enriched enzymes in response to Alzheimer's progression. For analysis, subjects were dichotomously grouped as case (MCI and AD) and control (NC and HPC).

| Enzyme                                            | <i>p</i> value |
|---------------------------------------------------|----------------|
| Mitochondrial 2-oxovalerate dehydrogenase         | 0.025          |
| 3-amino-isobutyrate transport                     | 0.025          |
| Mitochondrial 3-amino-isobutyrate transport       | 0.025          |
| 3-hydroxyacyl-CoA dehydratase                     | 0.025          |
| Mitochondrial 3-hydroxyisobutyrate dehydrogenase  | 0.025          |
| Mitochondrial 3-hydroxyisobutyryl-CoA hydrolase   | 0.025          |
| Mitochondrial acyl-CoA dehydrogenase              | 0.025          |
| L-3-amino-isobutanoate exchange                   | 0.025          |
| Mitochondrial L-3-aminoisobutyrate transaminase   | 0.025          |
| Mitochondrial malonate-semialdehyde dehydrogenase | 0.025          |
| Methylmalonate-semialdehyde dehydrogenase         | 0.025          |

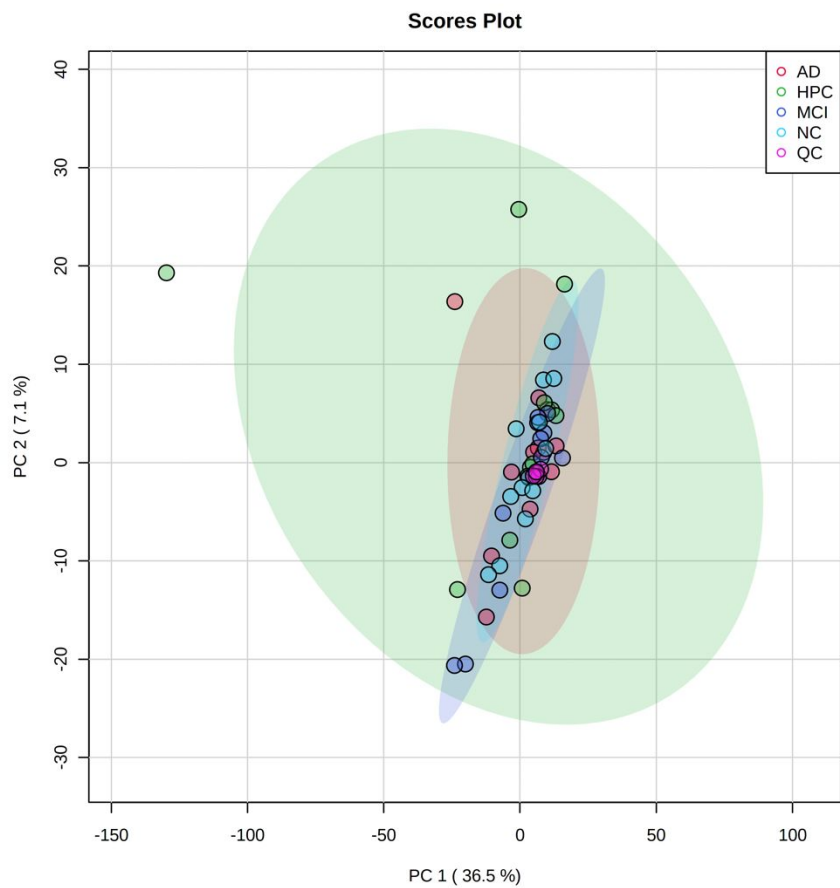

**Figure S1.** Scores plot of principal component analysis (PCA) conducted with all reliably detected metabolites between all groups, including quality control (QC) samples; 95% confidence intervals were evaluated for potential outliers. Data for sample 13 (HPC group) was reviewed and removed from further analysis.

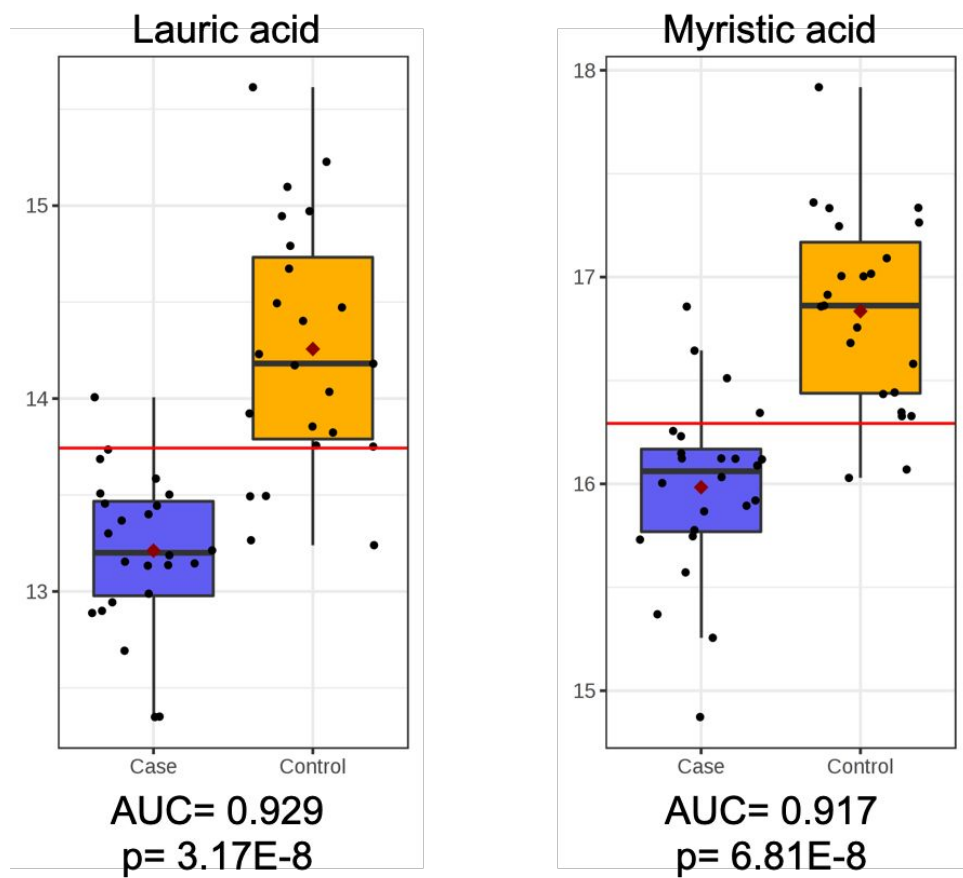

**Figure S2.** Significant metabolites between case (MCI and AD) and control (NC and HPC) as determined by independent samples t-test. Data were log<sub>10</sub>-transformed and Pareto scaled prior to plotting.



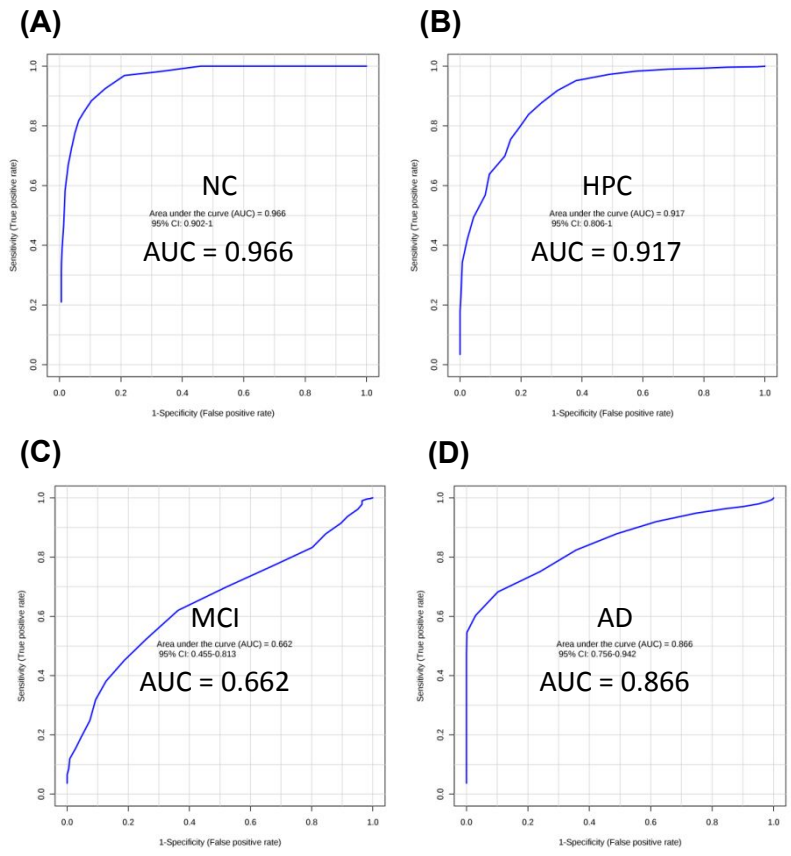

**Figure S3.** ROC analysis of PLS-DA model constructed using levels of lauric acid, myristic acid, stearic acid, and palmitic acid (all  $p < 0.05$ ): (A) classification of NC vs. HPC/MCI/AD, (B) classification of HPC vs. NC/MCI/AD, (C) classification of MCI vs. NC/HPC/AD, and (D) classification of AD vs. NC/HPC/MCI.

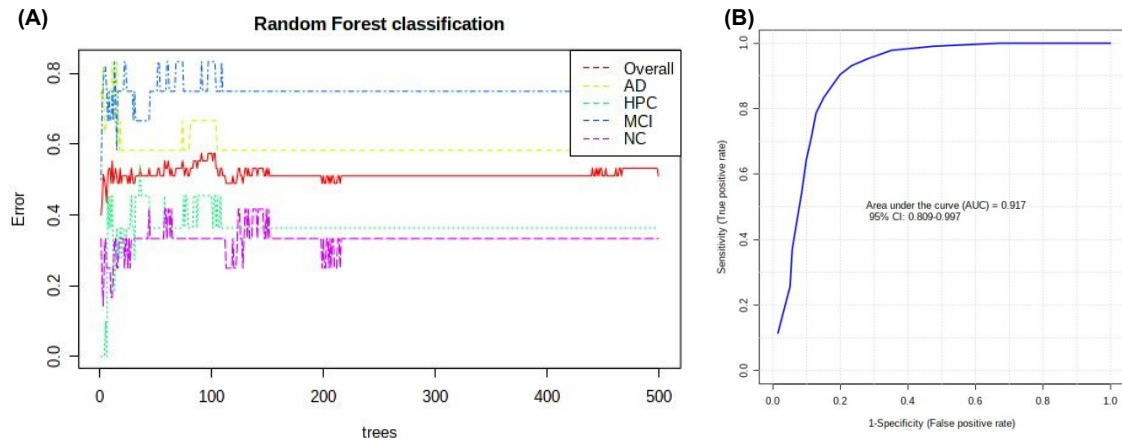

**Figure S4.** (A) RF analysis of study groups based on levels of lauric acid, myristic acid, stearic acid, palmitic acid (OOB error = 0.511), and (B) 100-fold LOOCV ROC analysis of case (MCI/AD) and control (NC/HPC) using RF classifier (AUC = 0.917).

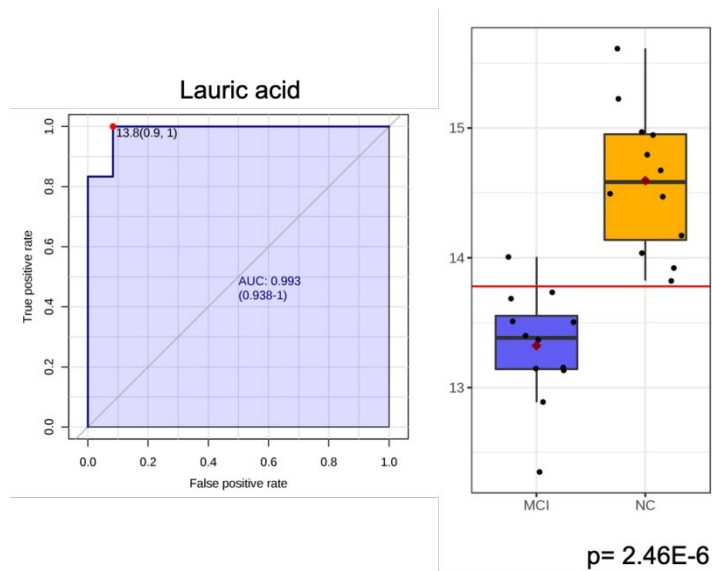

**Figure S5.** Univariate ROC analysis and t-testing between NC and MCI groups show lauric acid to be highly predictive (AUC = 0.993) and significant (FDR  $q < 0.001$ ).

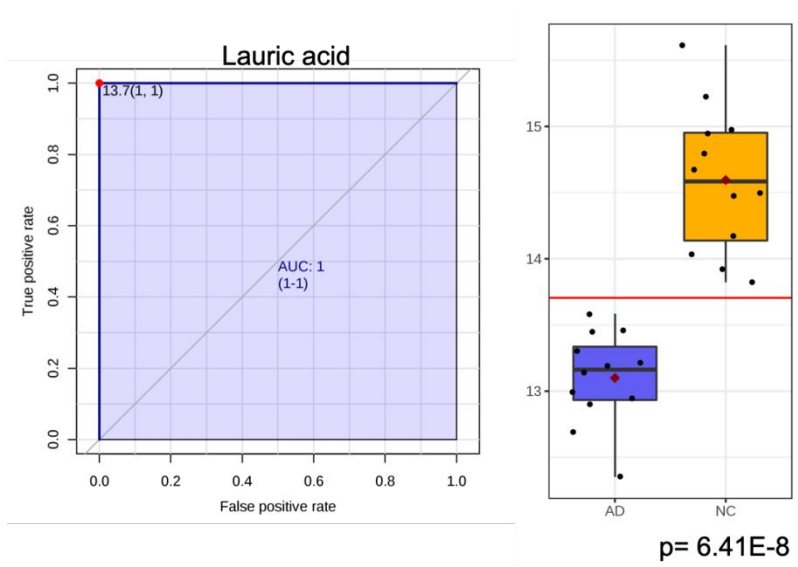

**Figure S6.** Univariate ROC analysis and t-testing between NC and AD groups show lauric acid to be highly predictive (AUC = 1.0) and significant (FDR  $q < 0.001$ ).

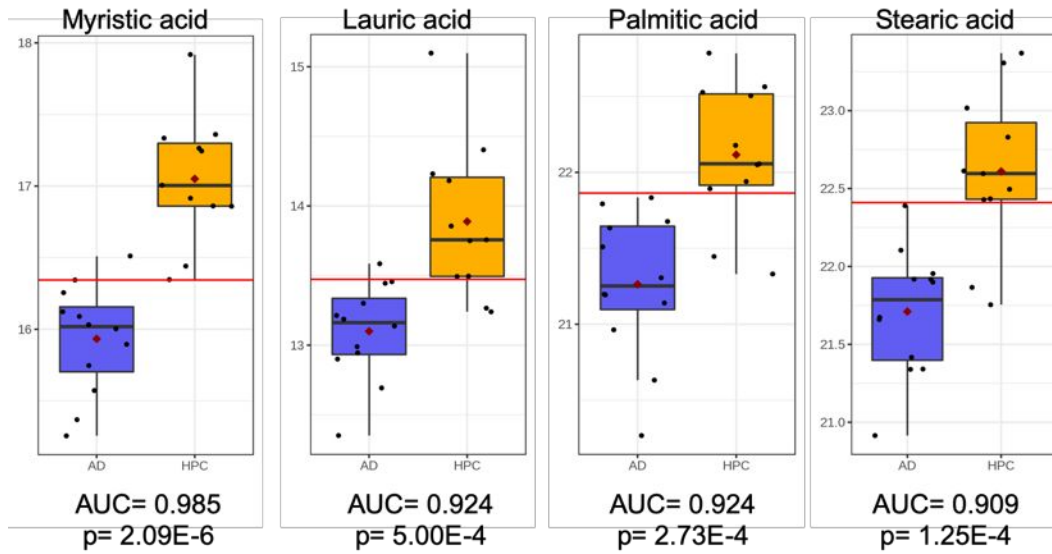

**Figure S7.** Univariate ROC analysis and t-testing of between HPC and AD groups show high predictive performance ( $AUC > 0.90$ ) and significance ( $FDR q < 0.01$ ) of myristic acid, lauric acid, palmitic acid, and stearic acid.

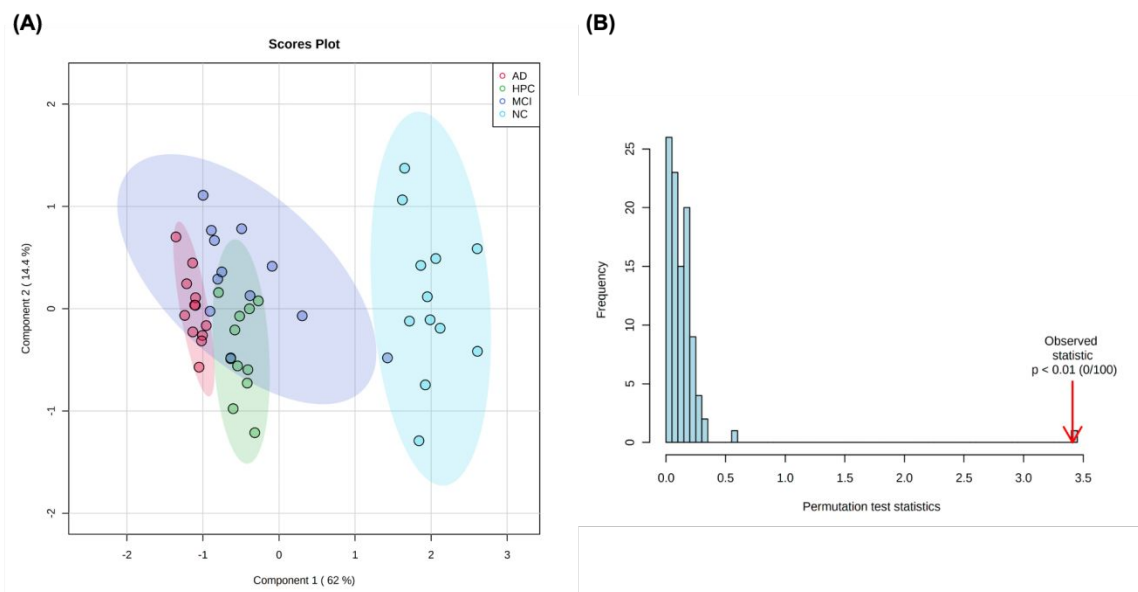

**Figure S8.** (A) Scores plot of PLS-DA model constructed using significant between-group metabolites (lauric acid, myristic acid, stearic acid, palmitic acid) in conjunction with highly correlated neuropathological characteristics (frontal plaque, total plaque, total tangle, and Braak score) ( $R^2X = 0.710$ ,  $R^2Y = 0.748$ ,  $R^2Q = 0.722$ ) and (B) Permutation testing with 100 iterations shows excellent model fit ( $p < 0.01$ ).

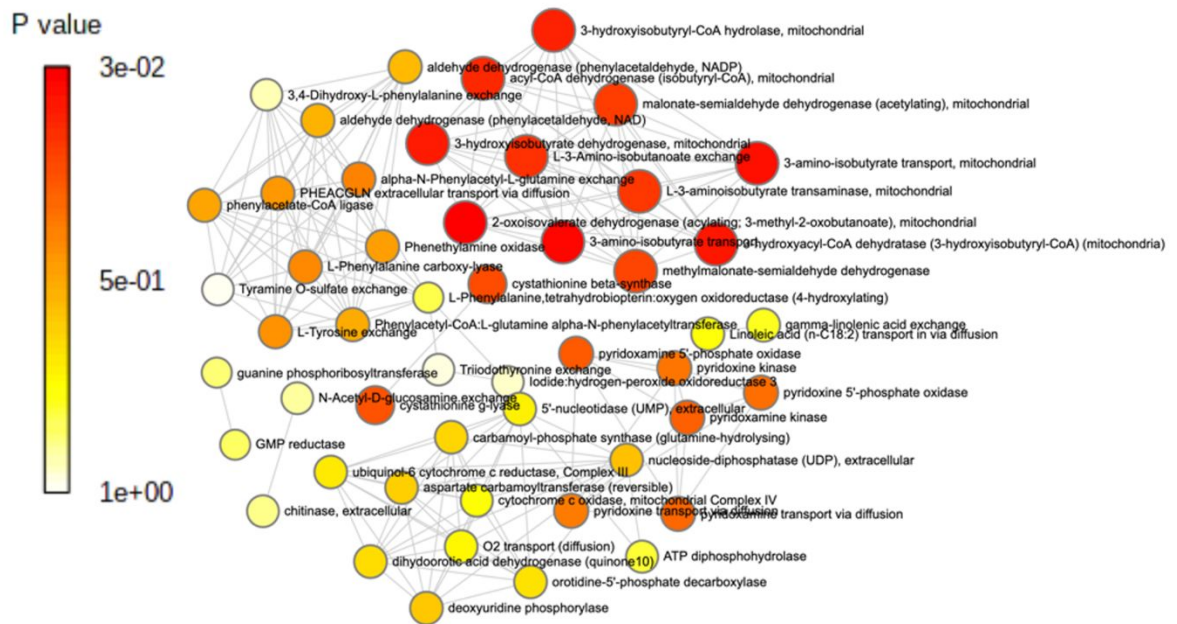

**Figure S9.** Network view of enzyme enrichment analysis conducted between case (MCI and AD) and control (NC and HPC). Enrichment ratios were significantly different for eleven enzymes between groups ( $p < 0.05$ ).
